# Supplementary material for: Pattern of β-Diversity and Plant Species Richness along Vertical Gradient in Northwest Himalaya, India
Source: MDPI journal article supplement (doi:10.3390/biology11071064), 2022-07-18
Supplement: s1 [file s1]

**Suppl. S2****Table S2.** Family wise contribution of the documented plant species

| <b>Family</b>   | <b>No. of species</b> | <b>Family</b>    | <b>No. of species</b> |
|-----------------|-----------------------|------------------|-----------------------|
| Adoxaceae       | 3                     | Amaranthaceae    | 2                     |
| Apiaceae        | 2                     | Araceae          | 2                     |
| Araliaceae      | 1                     | Aspleniaceae     | 2                     |
| Athyriaceae     | 1                     | Balsaminaceae    | 3                     |
| Berberidaceae   | 4                     | Betulaceae       | 2                     |
| Boraginaceae    | 3                     | Brassicaceae     | 6                     |
| Campanulaceae   | 2                     | Cannabaceae      | 2                     |
| Caprifoliaceae  | 5                     | Caryophyllacea   | 3                     |
| Celestraceae    | 1                     | Compositae       | 28                    |
| Crassulaceae    | 1                     | Cupressaceae     | 1                     |
| Cyperaceae      | 1                     | Cystopteridaceae | 1                     |
| Dryopteridaceae | 2                     | Equisetaceae     | 1                     |
| Ericaceae       | 2                     | Euphorbiaceae    | 1                     |
| Fabaceae        | 10                    | Gentianaceae     | 1                     |
| Geraniaceae     | 3                     | Grossulariaceae  | 1                     |
| Hamamelidaceae  | 1                     | Hypericaceae     | 1                     |
| Iridaceae       | 3                     | Juglandaceae     | 1                     |
| Lamiaceae       | 17                    | Malvaceae        | 2                     |
| Melanthiaceae   | 1                     | Moraceae         | 1                     |
| Oleaceae        | 1                     | Onagraceae       | 1                     |
| Orobanchaceae   | 3                     | Oxalidaceae      | 2                     |
| Papaveraceae    | 3                     | Phytolaccaceae   | 1                     |
| Pinaceae        | 4                     | Plantaginaceae   | 8                     |
| Platanaceae     | 1                     | Poaceae          | 6                     |
| Polemoniaceae   | 1                     | Polygonaceae     | 10                    |
| Primulaceae     | 5                     | Pteridaceae      | 2                     |
| Ranunculaceae   | 11                    | Rosaceae         | 9                     |
| Rubiaceae       | 1                     | Rutaceae         | 1                     |
| Salicaceae      | 4                     | Sapindaceae      | 2                     |

|               |   |                  |   |
|---------------|---|------------------|---|
| Saxifragaceae | 2 | Scrophulariaceae | 1 |
| Simaroubaceae | 1 | Solanaceae       | 2 |
| Taxaceae      | 1 | Ulmaceae         | 1 |
| Urticaceae    | 1 | Violaceae        | 2 |
