# Supplementary material for: Pattern of β-Diversity and Plant Species Richness along Vertical Gradient in Northwest Himalaya, India
Source: MDPI journal article supplement (doi:10.3390/biology11071064), 2022-07-18
Supplement: s1 [file s1]

## Suppl. S1

**Table S1.** List of the documented plant species from the Gulmarg Wildlife Sanctuary, Northwest Himalaya

| Taxa                                                                                       | Family        | Habit |
|--------------------------------------------------------------------------------------------|---------------|-------|
| <i>Acer caesium</i> Wall. ex Brandis                                                       | Sapindaceae   | Tree  |
| <i>Achillea millefolium</i> L.                                                             | Compositae    | Herb  |
| <i>Achnatherum sibiricum</i> (L.) Keng ex Tzve.                                            | Poaceae       | Herb  |
| <i>Aconitum heterophyllum</i> Wall. ex Royle                                               | Ranunculaceae | Herb  |
| <i>Aconitum violaceum</i> Jacq. ex Stapf.                                                  | Ranunculaceae | Herb  |
| <i>Adiantum abscissum</i> Schrad.                                                          | Pteridaceae   | Herb  |
| <i>Adiantum venustum</i> D. Don                                                            | Pteridaceae   | Herb  |
| <i>Aesculus indica</i> (Wall. ex Camb.) Hook.                                              | Sapindaceae   | Tree  |
| <i>Ailanthus altissima</i> (Mill.) Swingle                                                 | Simaroubaceae | Tree  |
| <i>Ajuga integrefolia</i> Buch.-Ham. ex D. Don                                             | Lamiaceae     | Herb  |
| <i>Ajuga parviflora</i> Benth.                                                             | Lamiaceae     | Herb  |
| <i>Alliaria petiolata</i> (M. Bieb.) Cav. & Grande                                         | Brassicaceae  | Herb  |
| <i>Anagallis arvensis</i> (M. Bieb.) Cavara & Grand                                        | Primulaceae   | Herb  |
| <i>Anaphalis busua</i> Buch.-Ham. ex DC.                                                   | Compositae    | Herb  |
| <i>Anaphalis roylei</i> DC.                                                                | Compositae    | Herb  |
| <i>Anaphalis triplinervis</i> (Sims) C.B. Clarke                                           | Compositae    | Herb  |
| <i>Androsace rotundifolia</i> Hardw.                                                       | Primulaceae   | Herb  |
| <i>Anemonastrum obtusilobum</i> (D. Don) Mosy.<br>Syn. <i>Anemone obtusiloba</i> D. Don    | Ranunculaceae | Herb  |
| <i>Aquilegia fragrans</i> Benth.                                                           | Ranunculaceae | Herb  |
| <i>Arctium lappa</i> L.                                                                    | Compositae    | Herb  |
| <i>Arisaema jacquemontii</i> Blume                                                         | Araceae       | Herb  |
| <i>Arisaema propinquum</i> (L.) Schott                                                     | Araceae       | Herb  |
| <i>Artemisia absinthium</i> L.                                                             | Compositae    | Herb  |
| <i>Artemisia roxburghiana</i> Besser                                                       | Compositae    | Herb  |
| <i>Asplenium adiantum nigrum</i> L.                                                        | Aspleniaceae  | Herb  |
| <i>Asplenium trichomanes</i> L.                                                            | Aspleniaceae  | Herb  |
| <i>Aster falconeri</i> (C.B. Clarke) Hutch.                                                | Compositae    | Herb  |
| <i>Astragalus grahamianus</i> Benth.                                                       | Fabaceae      | Shrub |
| <i>Astragalus rhizanthus</i> Benth.                                                        | Fabaceae      | Shrub |
| <i>Athyrium fimbriatum</i> T. Moore                                                        | Athyriaceae   | Herb  |
| <i>Berberis jaeschkeana</i> C.K. Sch.                                                      | Berberidaceae | Shrub |
| <i>Berberis lycium</i> Royle                                                               | Berberidaceae | Shrub |
| <i>Bergenia ciliata</i> (Haw.) Sternb.                                                     | Saxifragaceae | Herb  |
| <i>Bergenia stracheyi</i> (Hook.f. & Thomp.) Engl.                                         | Saxifragaceae | Herb  |
| <i>Betula utilis</i> D. Don                                                                | Betulaceae    | Tree  |
| <i>Bisorta affinis</i> (D. Don) Greene<br>Syn. <i>Polygonum affine</i> D. Don              | Polygonaceae  | Herb  |
| <i>Bistorta amplexicaulis</i> (D. Don) Greene<br>Syn. <i>Polygonum amplexicaule</i> D. Don | Polygonaceae  | Herb  |
| <i>Bupleurum candollei</i> Wall. ex DC.                                                    | Apiaceae      | Herb  |
| <i>Caltha palustris</i> L.                                                                 | Ranunculaceae | Herb  |
| <i>Campanula rotundifolia</i> L.                                                           | Campanulaceae | Herb  |
| <i>Cardamine hirsuta</i> L.                                                                | Brassicaceae  | Herb  |

|                                                                                                                           |                  |       |
|---------------------------------------------------------------------------------------------------------------------------|------------------|-------|
| <i>Cardamine impatiens</i> L.                                                                                             | Brassicaceae     | Herb  |
| <i>Carex nubigena</i> D. Don                                                                                              | Cyperaceae       | Herb  |
| <i>Carpesium cernuum</i> L.                                                                                               | Compositae       | Herb  |
| <i>Cedrus deodara</i> (Roxb. ex D. Don) G. Don                                                                            | Pinaceae         | Tree  |
| <i>Celtis australis</i> L.                                                                                                | Cannabaceae      | Tree  |
| <i>Chenopodium umbossum</i> L.                                                                                            | Amaranthaceae    | Herb  |
| <i>Chyrojasminum humile</i> (L.) Banfi<br>Syn. <i>Jasminum humile</i> L.                                                  | Oleaceae         | Shrub |
| <i>Cirsium arvense</i> (L.) Scop.                                                                                         | Compositae       | Herb  |
| <i>Cirsium falconeri</i> (Hook.f.) Petr.                                                                                  | Compositae       | Herb  |
| <i>Cirsium wallichii</i> DC.                                                                                              | Compositae       | Herb  |
| <i>Clinopodium umbrosum</i> (M.Bieb.) K. Koch                                                                             | Lamiaceae        | Herb  |
| <i>Clinopodium vulgare</i> L.                                                                                             | Lamiaceae        | Herb  |
| <i>Codonopsis ovata</i> Benth.                                                                                            | Campanulaceae    | Herb  |
| <i>Cordiofontis flexuosa</i> (Royle ex. Lindl.) G.L. Nesom<br>Syn. <i>Aster thomsonii</i> C.B. Clarke                     | Compositae       | Herb  |
| <i>Cortia depressa</i> (D. Don) C. Norman                                                                                 | Apiaceae         | Herb  |
| <i>Corydalis diphylla</i> Wall.                                                                                           | Papaveraceae     | Herb  |
| <i>Corydalis govaniana</i> Wall.                                                                                          | Papaveraceae     | Herb  |
| <i>Corydalis rutifolia</i> (Sm.) DC.                                                                                      | Papaveraceae     | Herb  |
| <i>Corylus colurna</i> L.                                                                                                 | Betulaceae       | Tree  |
| <i>Cotoneaster microphylla</i> Wall. ex Lindl.                                                                            | Rosaceae         | Shrub |
| <i>Crataegus songarica</i> K. Koch                                                                                        | Rosaceae         | Shrub |
| <i>Crepis pulchra</i> L.                                                                                                  | Compositae       | Herb  |
| <i>Crucihimalaya tibetica</i> (Hook.f. & Thomp.) Sheh. Germ. & K. Koch<br>Syn. <i>Arabis tibetica</i> Hook.f. & Thomp.)   | Brassicaceae     | Herb  |
| <i>Cynodon dactylon</i> (L.) Pers.                                                                                        | Poaceae          | Herb  |
| <i>Cynoglossum wallichii</i> G. Don                                                                                       | Boraginaceae     | Herb  |
| <i>Cystopteris fragilis</i> (L.) Bernh.                                                                                   | Cystopteridaceae | Herb  |
| <i>Datura stramonium</i> L.                                                                                               | Solanaceae       | Herb  |
| <i>Digitalis grandiflora</i> Mill.                                                                                        | Plantaginaceae   | Herb  |
| <i>Digitalis lanata</i> Ehrh.                                                                                             | Plantaginaceae   | Herb  |
| <i>Digitalis purpurea</i> L.                                                                                              | Plantaginaceae   | Herb  |
| <i>Dipsacus inermis</i> Wall.                                                                                             | Caprifoliaceae   | Herb  |
| <i>Dolomiaea costus</i> (Falc.) Kasana & Panday<br>Syn. <i>Saussurea costus</i> (Falc.) Lipsch.                           | Compositae       | Herb  |
| <i>Dryopteris filix-mas</i> (L.) Schott                                                                                   | Dryopteridaceae  | Herb  |
| <i>Dysphania botrys</i> (L.) Mosy. & Clem.<br>Syn. <i>Chenopodium botrys</i> L.                                           | Amaranthaceae    | Herb  |
| <i>Epilobium parviflorum</i> Schreb.                                                                                      | Onagraceae       | Herb  |
| <i>Epimedium elatum</i> C. Morren & Decne.                                                                                | Berberidaceae    | Herb  |
| <i>Equisetum arvense</i> L.                                                                                               | Equisetaceae     | Herb  |
| <i>Erigeron acris</i> var. <i>multicaulis</i> (Wall. ex DC.) C.B. Clarke<br>Syn. <i>Erigeron multicaulis</i> Wall. ex DC. | Compositae       | Herb  |
| <i>Euonymus hamiltonianus</i> Wall.                                                                                       | Celestraceae     | Tree  |
| <i>Euphorbia wallichii</i> Hook.f.                                                                                        | Euphorbiaceae    | Herb  |
| <i>Euphrasia parviflora</i> Sch.                                                                                          | Orobanchaceae    | Herb  |
| <i>Fagopyrum tataricum</i> (L.) Gaertn.                                                                                   | Polygonaceae     | Herb  |
| <i>Filago pyramidata</i> L.                                                                                               | Compositae       | Herb  |
| <i>Filipendula vestita</i> (Wall. ex G. Don) Maxim.                                                                       | Rosaceae         | Herb  |
| <i>Fragaria nubicola</i> (Lindl. Ex Hook.f.)                                                                              | Rosaceae         | Herb  |

|                                                                                                   |                 |       |
|---------------------------------------------------------------------------------------------------|-----------------|-------|
| Lac.                                                                                              |                 |       |
| <i>Galium aparine</i> L.                                                                          | Rubiaceae       | Herb  |
| <i>Gentiana carinata</i> (D. Don ex G. Don) Griseb.                                               | Gentianaceae    | Herb  |
| <i>Geranium nepalense</i> Sweet                                                                   | Geraniaceae     | Herb  |
| <i>Geranium pratense</i> L.                                                                       | Geraniaceae     | Herb  |
| <i>Geranium wallichianum</i> D. Don ex Sweet                                                      | Geraniaceae     | Herb  |
| <i>Hedera nepalensis</i> K. Koch                                                                  | Araliaceae      | Herb  |
| <i>Herniaria hirsuta</i> L.                                                                       | Caryophyllaceae | Herb  |
| <i>Humulus lupulus</i> L.                                                                         | Cannabaceae     | Herb  |
| <i>Hyoscyamus niger</i> L.                                                                        | Solanaceae      | Herb  |
| <i>Hypericum perforatum</i> L.                                                                    | Hypericaceae    | Herb  |
| <i>Impatiens brachycentra</i> Kar & Kir                                                           | Balsaminaceae   | Herb  |
| <i>Impatiens sulcata</i> Wall.                                                                    | Balsaminaceae   | Herb  |
| <i>Impatiens thomsonii</i> Hook.f.                                                                | Balsaminaceae   | Herb  |
| <i>Indigofera heterantha</i> Wall. ex Brandis                                                     | Fabaceae        | Shrub |
| <i>Inula royleana</i> DC.                                                                         | Compositae      | Herb  |
| <i>Iris decora</i> Wall.                                                                          | Iridaceae       | Herb  |
| <i>Iris hookeriana</i> Foster                                                                     | Iridaceae       | Herb  |
| <i>Iris pseudacorus</i> L.                                                                        | Iridaceae       | Herb  |
| <i>Jacobaea analoga</i> (DC.) Veldk.<br>Syn. <i>Senecio chrysanthemoides</i> DC.                  | Compositae      | Herb  |
| <i>Juglans regia</i> L.                                                                           | Juglandaceae    | Tree  |
| <i>Juniperus squamata</i> D. Don                                                                  | Cupressaceae    | Shrub |
| <i>Koeleria pyramidata</i> (Lam.) P. Beauv.                                                       | Poaceae         | Herb  |
| <i>Koenigia alpina</i> (All.) Sch. & Rev.<br>Syn. <i>Polygonum alpinum</i> All.                   | Polygonaceae    | Herb  |
| <i>Lamium album</i> L.                                                                            | Lamiaceae       | Herb  |
| <i>Lamium amplexicaule</i> L.                                                                     | Lamiaceae       | Herb  |
| <i>Lavatera cachemiriana</i> (Camb.) Alef.                                                        | Malvaceae       | Herb  |
| <i>Leontopodium jacotianum</i> Beauv.                                                             | Compositae      | Herb  |
| <i>Leucanthemum vulgare</i> Lam.                                                                  | Compositae      | Herb  |
| <i>Linaria dalmatica</i> (L.) Mill.                                                               | Plantaginaceae  | Herb  |
| <i>Lonicera iberica</i> M. Bieb.<br>Syn. <i>Lonicera alpigena</i> Gueld.                          | Caprifoliaceae  | Shrub |
| <i>Lonicera japonica</i> Thunb.                                                                   | Caprifoliaceae  | Shrub |
| <i>Lonicera obovata</i> Royle ex. Hook.f. & Thompson                                              | Caprifoliaceae  | Shrub |
| <i>Lotus corniculatus</i> L.                                                                      | Fabaceae        | Herb  |
| <i>Malva neglecta</i> Wall.                                                                       | Malvaceae       | Herb  |
| <i>Marrubium vulgare</i> L.                                                                       | Lamiaceae       | Herb  |
| <i>Medicago lupulina</i> L.                                                                       | Fabaceae        | Herb  |
| <i>Melanoseris macrorhiza</i> (Royle) N. Kilian<br>Syn. <i>Lactuca macrorhiza</i> (Royle) Hook.f. | Compositae      | Herb  |
| <i>Morus alba</i> L.                                                                              | Moraceae        | Tree  |
| <i>Myosotis alpestris</i> Schmidt                                                                 | Boraginaceae    | Herb  |
| <i>Myosotis stricta</i> Link ex Roem. & Sch.                                                      | Boraginaceae    | Herb  |
| <i>Nasturtium officinale</i> Aiton                                                                | Brassicaceae    | Herb  |
| <i>Nepeta cataria</i> L.                                                                          | Lamiaceae       | Herb  |
| <i>Nepeta connata</i> Royle ex Beath.                                                             | Lamiaceae       | Herb  |
| <i>Nepeta laevigata</i> (D. Don) Hand.-Mazz.                                                      | Lamiaceae       | Herb  |
| <i>Nepeta linearis</i> Royle ex Benth.                                                            | Lamiaceae       | Herb  |
| <i>Origanum vulgare</i> L.                                                                        | Lamiaceae       | Herb  |
| <i>Oxalis acetocella</i> L.                                                                       | Oxalidaceae     | Herb  |
| <i>Oxalis corniculata</i> L.                                                                      | Oxalidaceae     | Herb  |

|                                                                                                           |                 |       |
|-----------------------------------------------------------------------------------------------------------|-----------------|-------|
| <i>Oxyria digyna</i> (L.) Hill.                                                                           | Polygonaceae    | Herb  |
| <i>Parrotiopsis jacquemontiana</i> (Decne.) Rehder                                                        | Hamamelidaceae  | Shrub |
| <i>Pedicularis punctata</i> (Decne.) Rehder                                                               | Orobanchaceae   | Herb  |
| <i>Pedicularis siphonantha</i> D. Don                                                                     | Orobanchaceae   | Herb  |
| <i>Persicaria amphibia</i> (L.) Delarbre                                                                  | Polygonaceae    | Herb  |
| <i>Phleum alpinum</i> L.                                                                                  | Poaceae         | Herb  |
| <i>Phlomis bracteosa</i> (Royle ex Benth.) Kam. & Makhm.<br>Syn. <i>Phlomis bracteosa</i> Royle ex Benth. | Lamiaceae       | Herb  |
| <i>Phytolacca acinosa</i> Roxb.                                                                           | Phytolaccaceae  | Herb  |
| <i>Picea smithiana</i> (Wall.) Boiss                                                                      | Pinaceae        | Tree  |
| <i>Pinus wallichiana</i> A. B. Jacks.                                                                     | Pinaceae        | Tree  |
| <i>Plantago himaliaca</i> Pilg.                                                                           | Plantaginaceae  | Herb  |
| <i>Plantago lanceolata</i> L.                                                                             | Plantaginaceae  | Herb  |
| <i>Plantago major</i> L.                                                                                  | Plantaginaceae  | Herb  |
| <i>Platanus orientalis</i> L.                                                                             | Platanaceae     | Tree  |
| <i>Poa angustifolia</i> L.                                                                                | Poaceae         | Herb  |
| <i>Poa pratensis</i> L.                                                                                   | Poaceae         | Herb  |
| <i>Podophyllum hexandrum</i> Royle                                                                        | Berberidaceae   | Herb  |
| <i>Polemonium caeruleum</i> L.                                                                            | Polemoniaceae   | Herb  |
| <i>Polygonum aviculare</i> L.                                                                             | Polygonaceae    | Herb  |
| <i>Polystichum lonchitis</i> (L.) Roth.                                                                   | Dryopteridaceae | Herb  |
| <i>Primula elliptica</i> Royle                                                                            | Primulaceae     | Herb  |
| <i>Primula macrophylla</i> D. Don                                                                         | Primulaceae     | Herb  |
| <i>Primula rosea</i> Royle                                                                                | Primulaceae     | Herb  |
| <i>Prunella vulgaris</i> L.                                                                               | Lamiaceae       | Herb  |
| <i>Prunus cornuta</i> (Wall. ex Royle) Steud.                                                             | Rosaceae        | Herb  |
| <i>Quercus leucotrichophora</i> Camus                                                                     | Fagaceae        | Tree  |
| <i>Quercus robur</i> L.                                                                                   | Fagaceae        | Tree  |
| <i>Ranunculus brotherusii</i> Freyn                                                                       | Ranunculaceae   | Herb  |
| <i>Ranunculus trichophyllus</i> Chaix                                                                     | Ranunculaceae   | Herb  |
| <i>Ranunculus arvensis</i> L.                                                                             | Ranunculaceae   | Herb  |
| <i>Ranunculus hirtellus</i> Royle                                                                         | Ranunculaceae   | Herb  |
| <i>Ranunculus repens</i> L.                                                                               | Ranunculaceae   | Herb  |
| <i>Rheum webbianum</i> Royle                                                                              | Polygonaceae    | Herb  |
| <i>Rhodiola himalensis</i> (D. Don) Fu                                                                    | Crassulaceae    | Shrub |
| <i>Rhododendron anthopogon</i> D. Don                                                                     | Ericaceae       | Shrub |
| <i>Rhododendron campanulatum</i> D. Don                                                                   | Ericaceae       | Shrub |
| <i>Ribes orientale</i> Desf.                                                                              | Grossulariaceae | Shrub |
| <i>Robinia pseudoacacia</i> L.                                                                            | Fabaceae        | Tree  |
| <i>Rorippa islandica</i> (Oeder) Borbas                                                                   | Brassicaceae    | Herb  |
| <i>Rosa pouzinii</i> Tratt.<br>Syn. <i>Rosa microphylla</i> Desf.                                         | Rosaceae        | Shrub |
| <i>Rosa webbiana</i> Wall. ex Royle                                                                       | Rosaceae        | Shrub |
| <i>Rumex hastatus</i> D. Don                                                                              | Polygonaceae    | Herb  |
| <i>Rumex nepalensis</i> Spreng.                                                                           | Polygonaceae    | Herb  |
| <i>Salix alba</i> L.                                                                                      | Salicaceae      | Tree  |
| <i>Salix babylonica</i> L.                                                                                | Salicaceae      | Tree  |
| <i>Salix denticulata</i> Ander.                                                                           | Salicaceae      | Shrub |
| <i>Salix flabellaris</i> Ander.                                                                           | Salicaceae      | Shrub |
| <i>Salvia glutinosa</i> L.                                                                                | Lamiaceae       | Herb  |
| <i>Salvia hians</i> Royle ex Benth.                                                                       | Lamiaceae       | Herb  |
| <i>Sambucus wightiana</i> Wall. ex Wight & Arn.                                                           | Adoxaceae       | Herb  |
| <i>Saussurea atkinsonii</i> C.B. Clarke                                                                   | Compositae      | Herb  |
| <i>Saussurea candolleana</i> DC.                                                                          | Compositae      | Herb  |
| <i>Sibbaldia cuneata</i> Edgew.                                                                           | Rosaceae        | Herb  |

|                                                                                                     |                  |       |
|-----------------------------------------------------------------------------------------------------|------------------|-------|
| <i>Sigesbeckia orientalis</i> L.                                                                    | Compositae       | Herb  |
| <i>Silene baccifera</i> (L.) Durande                                                                | Caryophyllacea   | Herb  |
| <i>Silene coronaria</i> (L.) Clairv.                                                                | Caryophyllacea   | Herb  |
| <i>Skimmia anquetilia</i> Taylor & Shah                                                             | Rutaceae         | Shrub |
| <i>Sonchus oleraceus</i> L.                                                                         | Compositae       | Herb  |
| <i>Taraxacum</i> sect. <i>Taraxacum</i> F. H. Wigg.<br>Syn. <i>Taraxacum officinale</i> F. H. Wigg. | Compositae       | Herb  |
| <i>Taxus wallichiana</i> Zucc.                                                                      | Taxaceae         | Tree  |
| <i>Thalictrum alpinum</i> L.                                                                        | Ranunculaceae    | Herb  |
| <i>Thymus linearis</i> Benth.                                                                       | Lamiaceae        | Herb  |
| <i>Trifolium pratense</i> L.                                                                        | Fabaceae         | Herb  |
| <i>Trifolium repens</i> L.                                                                          | Fabaceae         | Herb  |
| <i>Trillium govanianum</i> Wall. ex D. Don                                                          | Melanthiaceae    | Herb  |
| <i>Tussilago farfara</i> L.                                                                         | Compositae       | Herb  |
| <i>Ulmus wallichiana</i> Planch.                                                                    | Ulmaceae         | Tree  |
| <i>Urtica dioica</i> L.                                                                             | Urticaceae       | Herb  |
| <i>Valeriana jatamansi</i> Jones ex Roxb.                                                           | Caprifoliaceae   | Herb  |
| <i>Verbascum thapsus</i> L.                                                                         | Scrophulariaceae | Herb  |
| <i>Veronica laxa</i> Benth.                                                                         | Plantaginaceae   | Herb  |
| <i>Viburnum cotinifolium</i> D. Don                                                                 | Adoxaceae        | Shrub |
| <i>Viburnum grandiflorum</i> Wall. ex DC.                                                           | Adoxaceae        | Shrub |
| <i>Viola biflora</i> L.                                                                             | Violaceae        | Herb  |
| <i>Viola odorata</i> L.                                                                             | Violaceae        | Herb  |
